# Supplementary material
Source: publisher site journal article supplement (https://www.dovepress.com/article/469024)
Supplement: Supplementary file 1 [file get_supplementary_file.php]

**SUPPLEMENTARY TABLES**

**Supplementary Table 1:** List of keywords related to schizophrenia and desired outcomes

| **Schizophrenia Terms:** Bipolar Disorder; Disorganized behavior; Mania; Neurosis; Paranoia; Paranoid; Personality Disorder; Psychosis; Psychotic; Psychotic Disorder; Schizoaffective Disorder; Schizophrenia; Schizophrenia, Catatonic; Schizophrenia, Treatment-Resistant; Schizotypal Personality Disorder; Severe Mental Illness |
| --- |
| **Oral Antipsychotics:** Asenapine; Brexpiprazole; Caplyta; Cariprazine; Fanapt; Fanaptum; Iloperidone; Invega; Latuda; Lumateperone; Lurasidone; Lybalvi; Olanzapine; Olanzapine Samidorphan; Paliperidone; Quetiapine Fumarate; Reagila; Rexulti; Rxulti; Saphris; Seroquel XR; Sycrest; Vraylar; Oral Antipsychotics; Atypical Antipsychotics |
| **Effectiveness:** Effect; Effectiveness; Effectivity; Real World Evidence; RWE |
| **Economic:** Analyses, Cost Benefit; Analyses, Cost-Benefit; Analyses, Cost-Utility; Analyses, Marginal; Analysis, Cost Benefit; Analysis, Cost-Benefit; Analysis, Cost-Effectiveness; Analysis, Cost-Utility; Analysis, Marginal; Benefit and Cost; Benefits and Costs; Budget; Budget Impact Analysis; Burden of Illness; CBA; CEA; Cost analysis. Cost and Benefit; Cost Avoidance; Cost Benefit; Cost Benefit Analyses; Cost Benefit Analysis; Cost Benefit Data; Cost Effectiveness; Cost Effectiveness Analysis; Cost of Illness; Cost Offset; Cost Utility Analysis; Cost-Benefit Analyses; Cost-Benefit Data; Cost-Effectiveness Analysis; Cost-Utility Analyses; Cost-Utility Analysis; Cost*; Costs and Benefits; CUA; Data, Cost-Benefit; Economic Analysis; Economic Burden; Economic Consequences; Economic Evaluation; Economic Evaluation; Economic Evaluations; Economic Model; Economic Modeling; Economic*; Economics Medical; Effectiveness, Cost; Evaluation, Economic; Evaluations, Economic; Expenditure; Financial Management; Financial Support; Health Economic Evaluation; Health Economics; Health Resource Allocation; Health Resource Utilization; Healthcare Costs; Healthcare Expenditure; ICER; Marginal Analyses; Marginal Analysis; Medical Cost*; Pharmacy Cost*; Price*; Socioeconomic; Value |
| **Humanistic:** Absenteeism; Activities of Daily Living; ADL; Caregiver Burden; Caregiver Stress; Caregiver Support; Caregiver*; Disability Evaluation; Employment; Family Caregiver Burden; Family Caregiver Support; Functional Status; Health Related Quality of Life; Health Utility; Health-Related Quality of Life; Healthcare Resource Use; HRQoL; Humanistic Care; Humanistic Outcomes; Indirect Cost*; Life Quality; Long-term Disability; Loss of Work Productivity; Mental Functioning; Missed Work; Patient Satisfaction; Physical Functioning; Presenteeism; Productivity; Psychosocial Outcomes; QoL; Quality of Life; Satisfaction; Short-term Disability; Sick Leave; Social Impairment; Stigmatization; Total Work Impairment; Unemployment; Usual activities; Utility; Work Impairment; Work Productivity |
| **Adherence:** Adherence Rate; Adherence, Drug; Adherence, Medication; Augmentation; Compliance, Drug; Compliance, Medication; Dose Intensity; Drug Adherence; Drug Compliance; Mean Adherence; Mean Medication Adherence Rate; Medication Adherence; Medication Compliance; Medication Discontinuation; Medication Event Monitoring; Medication Management; Medication Non-Adherence; Medication Non-Compliance; Medication Non-Adherence; Medication Non-Compliance; Medication Nonadherence; Medication Noncompliance; Medication Persistence; Medication Possession Ratio; Medication Taking Behavior; MPR; Non-Adherence, Medication; Non-Compliance, Medication; Nonadherence, Medication; Noncompliance, Medication; PDC; Persistence; Persistence, Medication; Proportion of Days Covered; Relative Dose Intensity; Treatment Adherence |
| **Behavioral:** Behavioral Outcomes; Disease Management; Interpersonal Relations; Severity of Illness; Suicide Ideation; Tolerability; Treatment Outcomes; Treatment Resistance |
| **Product Switching:** Drug Substitutions; Drug Switching; Drug Switching; Medication Alternative; Medication Switch; Product Switching; Substitution, Drug; Substitution, Therapeutic; Substitutions, Drug; Substitutions, Therapeutic; Switch; Switching, Drug; Switching, Drug; Therapeutic Substitution; Therapeutic Substitutions; Treatment switching |

ADL, Activities of Daily Living; CBA, Cost-Benefit Analysis; CEA, Cost-Effectiveness Analysis; CUA, Cost-Utility Analysis; HRQoL, Health-Related Quality of Life ICER, Incremental Cost-Effectiveness Ratio; MPR, Medication Possession Ratio; PDC, Proportion of Days Covered; QoL, Quality of Life; RWE, Real World Evidence.

*Words were also searched for their plural forms.

**Supplementary Table 2:** Characteristics of studies included in the systematic review, including HTA databases

| **Sr. No.** | **Author & Year** | **Sample size** | **Population description** | **Drugs** |
| --- | --- | --- | --- | --- |
| **RCT** | | | | |
| 1 | Awad 201418 | 235 | SCZ | Olanzapine and Others: Quetiapine, Risperidone, Aripiprazole, Ziprasidone |
| 2 | Awad 201619 | 144 | SCZ | Lurasidone and Others: Quetiapine, Risperidone, Ziprasidone, Aripiprazole |
| 3 | Ishigooka 202220 | 251 | SCZ | Paliperidone vs Aripiprazole, Blonanserin |
| 4 | Rui 201421 | 135 | SCZ | Paliperidone |
| 5 | Sinkeviciute 202122 | 144 | SCZ | Olanzapine and Others: Amisulpride, Aripiprazole |
| **Non-Randomized Experimental Study** | | | | |
| 6 | Guo 201123 | 1,133 | SCZ | Olanzapine and Others: Chlorpromazine, Sulphride, Clozapine, Risperidone, Quetiapine, Aripiprazole |
| 7 | Jariyavilas 201724 | 148 | SCZ | Paliperidone |
| 8 | Rosa 201225 | 96 | SCZ; Other: Schizoaffective disorder | Olanzapine vs Risperidone |
| 9 | Takahashi 201526 | 1,089 | SCZ | Olanzapine and Others: Rissperidone, Aripiprazole, Blonanserin, Quetiapine, Paliperidone, Perospirone, Zotepine, Haloperidol, Bromperidol, Sulpiride, Chlorpromazine, Levomepromazine, Fluphenazine |
| **Cohort Study** | | | | |
| 10 | Barbosa 202127 | 3,416 | SCZ | Olanzapine vs. Risperidone |
| 11 | Bianchini 201428 | 55 | SCZ | Olanzapine and Others: Aripiprazole, Ziprasidone, Haloperidol |
| 12 | Brodeur 202229 | 19,615 | SCZ | Olanzapine vs. Clozapine |
| 13 | De Yang 201730 | 1,693 | SCZ | Paliperidone |
| 14 | Emborg 201231 | 186 | SCZ | Quetiapine ER vs. Quetiapine IR |
| 15 | Gründer 201632 | 136 | SCZ | Olanzapine vs Others: Haloperidol, Flupentixol, Aripiprazole, Quetiapine |
| 16 | Hatta 201433 | 156 | SCZ | Olanzapine vs. Risperidone |
| 17 | Hong 201234 | 17,000 | SCZ | Olanzapine vs. Risperidone |
| 18 | Jo 202135 | 64,442 | SCZ | Olanzapine vs. Clozapine |
| 19 | Johnsen 201336 | 226 | SCZ; Psychosis | Risperidone, Olanzapine, Quetiapine, Ziprasidone |
| 20 | Joo 202137 | 44,396 | SCZ | Olanzapine, Paliperidone, and Others: LAI Paliperidone, Clozapine, Quetiapine, Bionanserin, Risperidone, Chloropromazine, Ziprasidone, Aripiprazole, Amisulpride, Sulpride, Haloperidol |
| 21 | Taipale 202038 | 18,215 | SCZ | Olanzapine, Paliperidone, and Others: Aripiprazole, Clozapine, Quetiapine, Risperidone, Ziprasidone |
| 22 | Vanasse 201639 | 18,869 | SCZ | Olanzapine and Others: Clozapine, Risperidone, Quetiapine |
| 23 | Zhong 202140 | 60 | SCZ | Paliperidone and Haloperidol |
| **Cross-Sectional Study** | | | | |
| 24 | 201341 | 9,567 | SCZ | Olanzapine and Others: Amisulpride, Aripiprazole, Clozapine, Quetiapine, Risperidone, Ziprasidone |
| 25 | Buoli 201642 | 220 | SCZ | Risperidone, Olanzapine, Quetiapine, Clozapine, Aripiprazole, Haloperidol |
| 26 | Chaves 201343 | 115 | SCZ | Olanzapine, Risperidone |
| 27 | Hakami 202244 | 746 | SCZ | Olanzapine, Paliperidone, and Others: Amisulpride, Aripiprazole, Clozapine, Haloperidol, Quetiapine, Risperidone, Trifluoperazine |
| 28 | He 201545 | 1,131 | SCZ | Olanzapine and Others: atypical vs. typical |
| 29 | Klasik 201146 | 20 | SCZ | Olanzapine |
| 30 | Kongsakon 201747 | 984 | SCZ | Paliperidone |
| 31 | Matsuzaki 202148 | 95 | SCZ | Asenapine vs Olanzapine |
| 32 | Sağlam Aykut 201949 | 84 | SCZ | Paliperidone and Other Oral Antipsychotics: Amisulpride, Aripiprazole, Clozapine, Olanzapine, Risperidone, Quetiapine |
| 33 | Wang 201750 | 533 | SCZ | Olanzapine, Aripiprazole, Risperidone, Quetiapine, Ziprasidone |
| **Economic Evaluation** | | | | |
| 34 | Barbosa 201851 | 1,74,310 | SCZ | Olanzapine, Clozapine, Quetiapine, Risperidone, Ziprasidone |
| 35 | Druais 201652 | NR | SCZ | Olanzapine, LAI |
| 36 | Garcia-Ruiz 201253 | NR | SCZ | Olanzapine, Paliperidone and Others: Amisulpride, Risperidone, Haloperidol (comparator) |
| 37 | Jin 202054 | 2,00,000 | SCZ; Psychosis | Olanzapine, Amisulpride, Risperidone |
| 38 | Kearns 202155 | NR | SCZ | Brexpiprazole, Lumateperone, Lurasidone, Olanzapine, Paliperidone, and Others: Aripiprazole, Cariprazine, Quetiapine, Risperidone, Ziprasidone |
| 39 | Kim 201156 | NR | SCZ | Olanzapine, Risperidone |
| 40 | Lachaine 201457 | NR | SCZ | Asenapine |
| 41 | Lubinga 201558 | NR | SCZ | Olanzapine, Chlorpromazine, Haloperidol, Risperidone, Quetiapine |
| 42 | McIntyre 201059 | NR | SCZ | Olanzapine, Ziprasidone, Quetiapine, Risperidone |
| 43 | Németh 201760 | 461 | SCZ | Cariprazine, Risperidone |
| 44 | Phanthunane 201161 | NR | SCZ | Olanzapine and Others: Risperidone, Clozapine |
| 45 | Přibylová 201562 | 625 | Other: Schizoaffective disorder | Paliperidone |
| 46 | Rajagopalan 201663 | NR | SCZ | Lurasidone, Aripiprazole |
| 47 | Stargardt 201264 | 8,610 | SCZ | All atypical antipsychotics |
| 48 | Zhao 201965 | NR | SCZ | Olanzapine, Aripiprazole |

LAI, Long-Acting Injectables; OAT, Oral Antipsychotic Treatments; RCT, Randomized-Controlled Trial; SCZ, Schizophrenia; Sr. No., Serial Number; ER, Extended Release; NA, Not Available; NR, Not Reported.

**Supplementary Table 3:** Comparison of the characteristics of drugs associated with oral antipsychotic treatments

| **Outcome Measures** | **Asenapine** | **Brexpiprazole** | **Cariprazine** | **Iloperidone** | **Lumateperone** | **Lurasidone** | **Olanzapine** | **Paliperidone** | **Quetiapine** | **Others*** |
| --- | --- | --- | --- | --- | --- | --- | --- | --- | --- | --- |
| **Effectiveness** | NR | NR | NR | ✓ | NR | NR | ✓ | ✓ | ✓ | ✓ |
| **Economic** | ✓ | ✓ | ✓ | ✓ | ✓ | ✓ | ✓ | ✓ | ✓ | ✓ |
| **Humanistic** | NR | NR | NR | NR | NR | NR | ✓ | ✓ | ✓ | ✓ |
| **Behavioral** | NR | NR | NR | NR | NR | NR | ✓ | NR | NR | ✓ |
| **Medication Adherence** | ✓ | NR | NR | ✓ | NR | ✓ | ✓ | ✓ | NR | ✓ |
| **Product Switching** | NR | NR | NR | NR | NR | ✓ | ✓ | ✓ | ✓ | ✓ |

NR, not reported; OAT, oral antipsychotic therapy

*Other antipsychotics included amisulpride, aripiprazole, clozapine, haloperidol, risperidone, and ziprasidone.

**Supplementary Table 4:** Evidence from HTA databases

| **Sr. No.** | **Year** | **Institution, Country** | **Drug** | **Report Title** | **Patient Population** | **Sample Size** | **Outcome** | **Outcome Notes** |
| --- | --- | --- | --- | --- | --- | --- | --- | --- |
| 1 | 2021 | All Wales Medicines Strategy Group, UK66 | Lurasidone | Lurasidone (Latuda®) | SCZ | - | Efficacy and Adverse Events | - Significant improvements were observed in PANSS, YMRS, and MADRS scales. - Lurasidone was significantly associated with the development of adverse effects. - Lurasidone (Latuda®) is recommended as an option for use within NHS Wales for the treatment of schizophrenia in adults aged 18 years and over. |
| 2 | 2020 | The National Health Care Institute – Zorginstituut Nederland, Netherlands67 | Amisulpride, Aripiprazole, Cariprazine (Reagila®), Lurasidone (Latuda®), Olanzapine (Zyprexa®), Paliperidone (Invega®), Quetiapine (Seroquel®), Risperidone (Risperdal®), Sertindole (Serdolect®) and Sulpiride | GVS assessment of amisulpride (Aktiprol®) for the treatment of schizophrenia | SCZ | 58 | Effectiveness | - The product amisulpride (Aktiprol®) is interchangeable and as effective as the comparison drugs of aripiprazole, cariprazine (Reagila®), lurasidone (Latuda®), olanzapine (Zyprexa®), paliperidone (Invega®), quetiapine (Seroquel®), risperidone (Risperdal®), sertindole (Serdolect®) and sulpiride. |
| 3 | 2019 | Hayes, Inc, US68 | Cariprazine vs Placebo | Cariprazine (Vraylar®) for schizophrenia and acute manic or mixed episodes in bipolar I disorder | SCZ,  Bipolar I disorder | - | Efficacy and Adverse Events | - Cariprazine was associated with a moderate and significant reduction of manic symptoms based on YMRS change scores (SMD: -0.52; 95% CI: -0.82 to -0.21; P= 018). - Cariprazine resulted in significantly higher remission (OR: 2.05; 95% CI: 1.61 to 2.61; P=0.006) and response rates (OR: 2.31; 95% CI: 1.35 to 3.95; P=0.021) for manic and mixed episodes compared with placebo. - Both cariprazine 1.5 mg and 3 mg doses were associated with a small but significant reduction in depressive symptoms assessed with MADRS scores (SMD: -0.26; 95% CI: -0.49 to -0.02; P=0.040) and (SMD: -0.21; 95% CI: -0.41 to -0.01; P=0.045), respectively. Cariprazine was significantly associated with the development of adverse effects but not with dropouts due to these adverse effects when compared to placebo. |
| 4 | 2018 | NIHR Health Technology Assessment Program, England69 | Amisulpride vs. Placebo | Amisulpride for very late-onset schizophrenia-like psychosis: the ATLAS three-arm RCT | SCZ psychosis | 101 | Efficacy, Adverse Events, and Cost Effectiveness | - Despite suboptimal compliance, improvements in BPRS scores at 12 weeks were 7.7 points (95% CI: 3.8 to 11.5 points) greater with amisulpride than with placebo (11.9 vs 4.2 points; p=0.0002). - Fewer participants allocated to the amisulpride group stopped treatment because of non-efficacy in stages 1 (p=0.01) and 2 (p=0.031). - The number of patients stopping because of extrapyramidal symptoms and other side effects did not differ significantly between groups. - Amisulpride treatment in the base-case analyses was associated with non-significant reductions in combined NHS, social care, and unpaid carer costs and non-significant reductions in QALYs in both stages. - Including patients who were intensive users of inpatient services in sensitivity analyses did not change the QALY result but resulted in placebo dominance in stage 1 and significant reductions in NHS/social care (95% CI: –£8923 to –£122) and societal costs (95% CI: –£8985 to –£153) for those continuing with amisulpride. |
| 5 | 2017 | NIHR Health Technology Assessment Program, England70 | Amisulpride vs. Placebo | Amisulpride augmentation in clozapine-unresponsive schizophrenia (AMICUS): a double-blind, placebo-controlled, randomized trial of clinical effectiveness and cost-effectiveness | SCZ | 68 | Efficacy, Adverse events, and Cost Effectiveness | - Compared with the participants assigned to placebo, those receiving amisulpride had:   - a greater chance of being a responder by the 12-week follow-up (OR: 1.17; 95% CI: 0.40 to 3.42)   - a greater improvement in negative symptoms, although neither finding had been present at the 6-week follow-up, and neither was statistically significant. - Amisulpride was associated with a more significant side effect burden, including cardiac side effects. - Economic analyses indicated that amisulpride augmentation has the potential to be cost-effective in the short term (net saving of between £329 and £2011; no difference in QALYs) and possibly in the longer term. |
| 6 | 2014 | CADTH, Canada71 | Lurasidone | Lurasidone (Latuda® - Sunovion Pharmaceuticals Inc.) indication: schizophrenia | SCZ | - | Efficacy and Adverse Events | - Significant improvement in PANSS, BRPS, and YMRS scales. - The CDEC recommends that lurasidone be listed for the management of the manifestations of schizophrenia |
| 7 | 2014 | CADTH, Canada72 | Lurasidone | Pharmacoeconomic review report. Lurasidone (Latuda® - Sunovion Pharmaceuticals Inc.) indication: schizophrenia | SCZ | - | Cost Effectiveness | - Significant improvements in cost savings were observed with lurasidone |
| 8 | 2016 | NIHR Health Technology Assessment Program, England73 | Citalopram | Antidepressant Controlled Trial For Negative Symptoms In Schizophrenia (ACTIONS): a double-blind, placebo-controlled, randomized clinical trial | SCZ | 62 | Humanistic Outcome | - Citalopram improved quality-of-life at 3 and 12 months, and negative symptoms. - Secondary outcomes include the EQ-5D for health economics. |
| 9 | 2014 | AWTTC and the secretariat of AWMSG, UK74 | Aripiprazole | Aripiprazole monohydrate (Abilify Maintena®) | SCZ | - | Efficacy and Adverse Events | - Aripiprazole was significantly associated with the development of adverse effects but was not significant in the long term. - It is recommended as an option for use within NHS Wales for the maintenance treatment of schizophrenia in adult patients. |
| 10 | 2003 | NIHR Health Technology Assessment Program, England75 | Risperidone, Amisulpride, Zotepine, Olanzapine,  Clozapine, Quetiapine, Sertindole, Ziprasidone | A systematic review of atypical antipsychotic drugs in schizophrenia | SCZ,  Schizoaffective disorder,  Schizophreniform disorder | - | Adverse Events and Cost Effectiveness | - Individuals with schizophrenia found new atypical antipsychotic drugs (except for zotepine and ziprasidone) more acceptable than their typical comparators. - Apart from clozapine for those with treatment-resistant illness, none of the new atypical antipsychotic drugs stands out as being more effective than the others. |

AMICUS, Amisulpride Augmentation in Clozapine-Unresponsive Schizophrenia; AWMSG, All Wales Medicines Strategy Group; AWTTC, All Wales Therapeutics, and Toxicology Centre; BPRS, Brief Psychiatric Rating Scale; CADTH, Canadian Agency for Drugs and Technologies in Health; CDEC, Canadian Drug Expert Committee; CI, Confidence Interval; EQ-5D, EuroQol-5D; MADRS, Montgomery-Asberg Depression Rating Scale; NHS, National Health Service; OR, Odds Ratio; PANSS, Positive and Negative Syndrome Scale; QALYs, Quality-Adjust Life-Years; RCT, Randomized Controlled Trial; SMD, Social Media Disorder; SCZ, Schizophrenia; US, United States; YMRS, Young Mania Rating Scale.
